# Supplementary material for: Diet composition and social environment determine food consumption, phenotype and fecundity in an omnivorous insect
Source: PubMed Central journal article supplement (PMC7211883; doi:10.1098/rsos.200100), 2020-04-22
Supplement: rsos200100supp1.pdf [file rsos200100supp1.pdf]

## **Diet quality and social environment determine food consumption, phenotype and fecundity in an omnivorous insect**

*Yeisson Gutiérrez, Marion Fresch, David Ott, Jens Brockmeyer, Christoph Scherber*

### **Quantification of lipid content**

Insects were individually homogenized in methanol in a 1:30 ratio (w/v) with an Ultra-Turrax Tube Drive (IKA®-Werke GmbH & Co., Germany) at 6000 rpm during 3 min. An aliquot of 2 mL of each sample (avoiding suspended particles) was mixed with chloroform to reach a 2:1 chloroform:methanol solution and the vials were shaken in the cold for 1h. Recovery of the liquid phase was done after short centrifugation and 1.2 mL 150mM Ammonium bicarbonate was added to induce phase separation and force polar lipids into the organic phase. Samples were vigorously shaken for 10 min and finally centrifuged at 5000 rpm during 10 min at 4°C (Z326K, Hermle, Germany) and the lower organic phase was transferred to glass vials. The chloroform and methanol of the resulting organic phase (containing the lipids) were evaporated in a vacuum concentrator (RVC 2-18 CDplus, Martin Christ Gefriertrocknungsanlagen GmbH, Germany) and weighted using an analytical scale (Quintix 220 g x 0.1 mg, Sartorius, Germany).

**Table S1.** Diet recipes and diet constitution

| Diet | EggPowder | Whey   | Casein | Sugar   | ingredients | Vanderzant | Methyl paraben | Agar | Water (ml) |
|------|-----------|--------|--------|---------|-------------|------------|----------------|------|------------|
| 3:1  | 9.128     | 24.017 | 25.914 | 10.941  | 70          | 2          | 0.3            | 4    | 300        |
| 1:1  | 9.128     | 16.366 | 17.654 | 26.845r | 70          | 2          | 0.3            | 4    | 300        |

\*all amounts expressed in g, except water.

**Diet 3:1**

|                  | EggPowder | Whey     | Casein   | Sugar/Sucrose | Total    | P:C      | cal/g        |
|------------------|-----------|----------|----------|---------------|----------|----------|--------------|
| <b>Carbs(g)</b>  | 0.14187   | 0.087805 | 0.094737 | 1             | 1.324412 | 3.001739 | 4.087045     |
| <b>Prot(g)</b>   | 0.375539  | 1.8      | 1.8      | 0             | 3.975539 |          |              |
| <b>Fat(g)</b>    | 0.317122  | 0.164634 | 0.035526 | 0             | 0.517282 |          | <b>fat/g</b> |
| <b>Cal</b>       | 4.923736  | 9.043902 | 8.431579 | 3.75          | 26.14922 |          | 0.08085      |
| <b>total (g)</b> | 0.834531  | 2.195122 | 2.368421 | 1             | 6.398074 |          |              |
| <b>%</b>         | 13.04348  | 34.3091  | 37.01772 | 15.62970245   | 100      |          |              |

**Diet 1:1**

|                  | EggPowder | Whey     | Casein   | Sugar/Sucrose | Total    | P:C      | cal/g        |
|------------------|-----------|----------|----------|---------------|----------|----------|--------------|
| <b>Carbs(g)</b>  | 0.057825  | 0.02439  | 0.026316 | 1             | 1.108531 | 1.040175 | 4.069015     |
| <b>Prot(g)</b>   | 0.153066  | 0.5      | 0.5      | 0             | 1.153066 |          |              |
| <b>Fat(g)</b>    | 0.129256  | 0.045732 | 0.009868 | 0             | 0.184856 |          | <b>fat/g</b> |
| <b>Cal</b>       | 2.006871  | 2.512195 | 2.342105 | 3.75          | 10.61117 |          | 0.070886     |
| <b>total (g)</b> | 0.340148  | 0.609756 | 0.657895 | 1             | 2.607798 |          |              |
| <b>%</b>         | 13.04348  | 23.38203 | 25.22797 | 38.34652162   | 100      |          |              |

**Table S2.** Models used for every response variable studied

| <b>Response variable</b> | <b>Model</b>                | <b>function</b> | <b>Distribution</b>            | <b>Random factor</b>   |
|--------------------------|-----------------------------|-----------------|--------------------------------|------------------------|
| Nymph survival           | mixed-effects<br>Cox models | coxme           | NA                             | Experimental unit code |
| Development time         | GLMM                        | glmer           | Poisson                        | Experimental unit code |
| Individual body mass     | GLMM                        | lme             | Gaussian                       | Experimental unit code |
| Food consumption         | GLM                         | glm             | Gamma<br>(inverse link)        | NA                     |
| Cannibalism              | GLM                         | glm             | quasi-binomial<br>(logit-link) | NA                     |
| Protein (total)          | GLM                         | glm             | Gamma<br>(inverse link)        | NA                     |
| Protein (Relative)       | GLM                         | glm             | quasi-binomial<br>(logit-link) | NA                     |
| Lipids (total)           | GLM                         | glm             | Gamma<br>(log-link)            | NA                     |
| Lipids (relative)        | GLM                         | glm             | quasi-binomial<br>(logit-link) | NA                     |
| Weekly egg production    | GLMM                        | glmer           | Negative binomial (1)          | Experimental unit code |
| Total fecundity          | GLM                         | glm             | Negative binomial (1)          | NA                     |
| Adult female lifespan    | log rank test               | survfit         | NA                             | NA                     |

**Table S3.** Summary for structural equation model for direct and indirect effects of the experimental treatments on several traits of female *A. domesticus*. SE = Standard errors.

| Left-hand-side     | Operator | Right-hand-side    | Estimate | SE   | Z value | P value           |
|--------------------|----------|--------------------|----------|------|---------|-------------------|
| <b>Regressions</b> |          |                    |          |      |         |                   |
| Food consumption   | ~        | Social environment | 0.34     | 0.11 | -3.03   | <b>0.002</b>      |
| Body mass          | ~        | Social environment | -0.09    | 0.13 | -0.66   | 0.508             |
| Body mass          | ~        | Diet composition   | -0.05    | 0.13 | -0.41   | 0.683             |
| Body mass          | ~        | Food consumption   | 0.48     | 0.11 | 4.52    | <b>&lt; 0.001</b> |
| Development time   | ~        | Food consumption   | -0.19    | 0.13 | -1.54   | 0.124             |
| Development time   | ~        | Diet composition   | 0.40     | 0.13 | 3.17    | <b>0.002</b>      |
| <b>Covariance</b>  |          |                    |          |      |         |                   |
| Body mass          | ~~       | Development time   | 0.28     | 0.13 | 2.18    | <b>0.029</b>      |
| <b>Variances</b>   |          |                    |          |      |         |                   |
| Food consumption   |          |                    | 0.89     | 0.08 | 11.65   | 0.000             |
| Body mass          |          |                    | 0.73     | 0.11 | 6.52    | 0.000             |
| Development time   |          |                    | 0.81     | 0.11 | 7.66    | 0.000             |

**Table S4.** Summary for structural equation model for direct and indirect effects of the experimental treatments on several traits of male *A. domesticus*. SE = Standard errors.

| Left-hand-side     | Operator | Right-hand-side    | Estimate | SE   | Z value | P value      |
|--------------------|----------|--------------------|----------|------|---------|--------------|
| <b>Regressions</b> |          |                    |          |      |         |              |
| Food consumption   | ~        | Social environment | -0.08    | 0.13 | -0.62   | 0.535        |
| Body mass          | ~        | Social environment | -0.11    | 0.11 | -0.99   | 0.324        |
| Body mass          | ~        | Food consumption   | 0.27     | 0.11 | 2.41    | <b>0.016</b> |
| Development time   | ~        | Diet composition   | 0.23     | 0.12 | 2.03    | <b>0.043</b> |
| <b>Covariance</b>  |          |                    |          |      |         |              |
| Body mass          | ~~       | Development time   | 0.24     | 0.12 | 2.08    | <b>0.038</b> |
| <b>Variances</b>   |          |                    |          |      |         |              |
| Food consumption   |          |                    | 0.99     | 0.02 | 46.71   | 0            |
| Body mass          |          |                    | 0.91     | 0.06 | 14.29   | 0            |
| Development time   |          |                    | 0.95     | 0.05 | 17.60   | 0            |

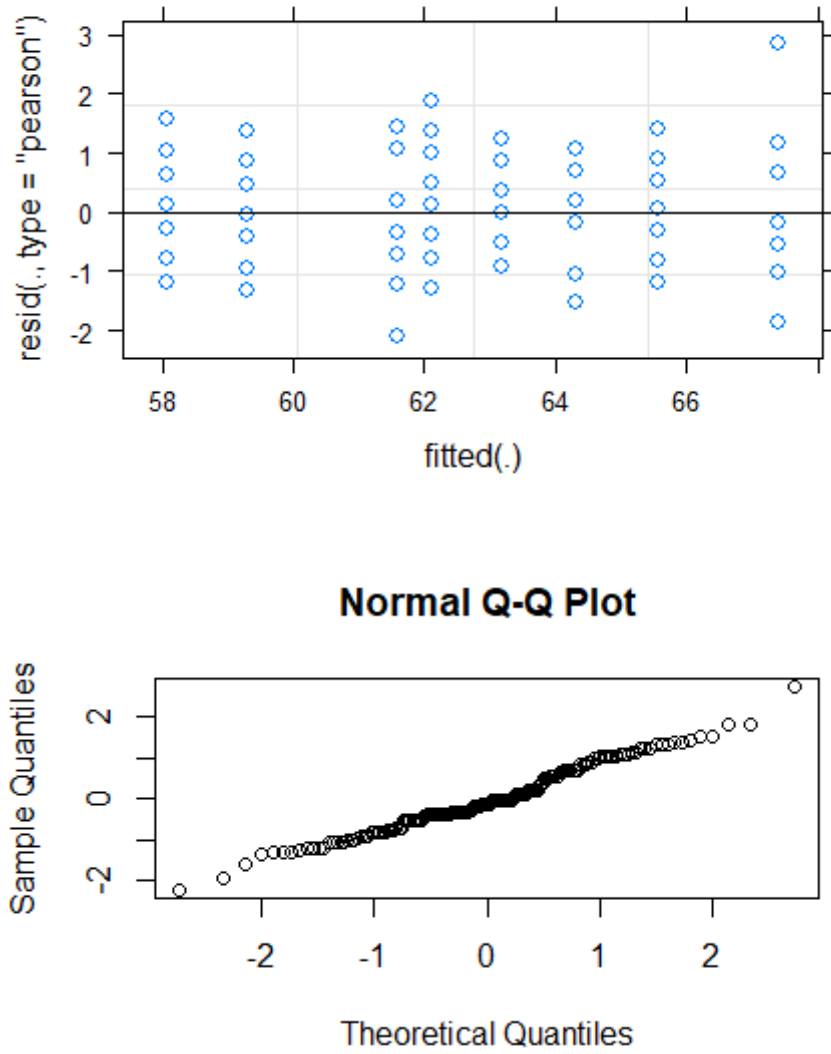

**Fig. S1.** Regression diagnostics for GLMM for development time of *Acheta domesticus*. Residual and quantile plots

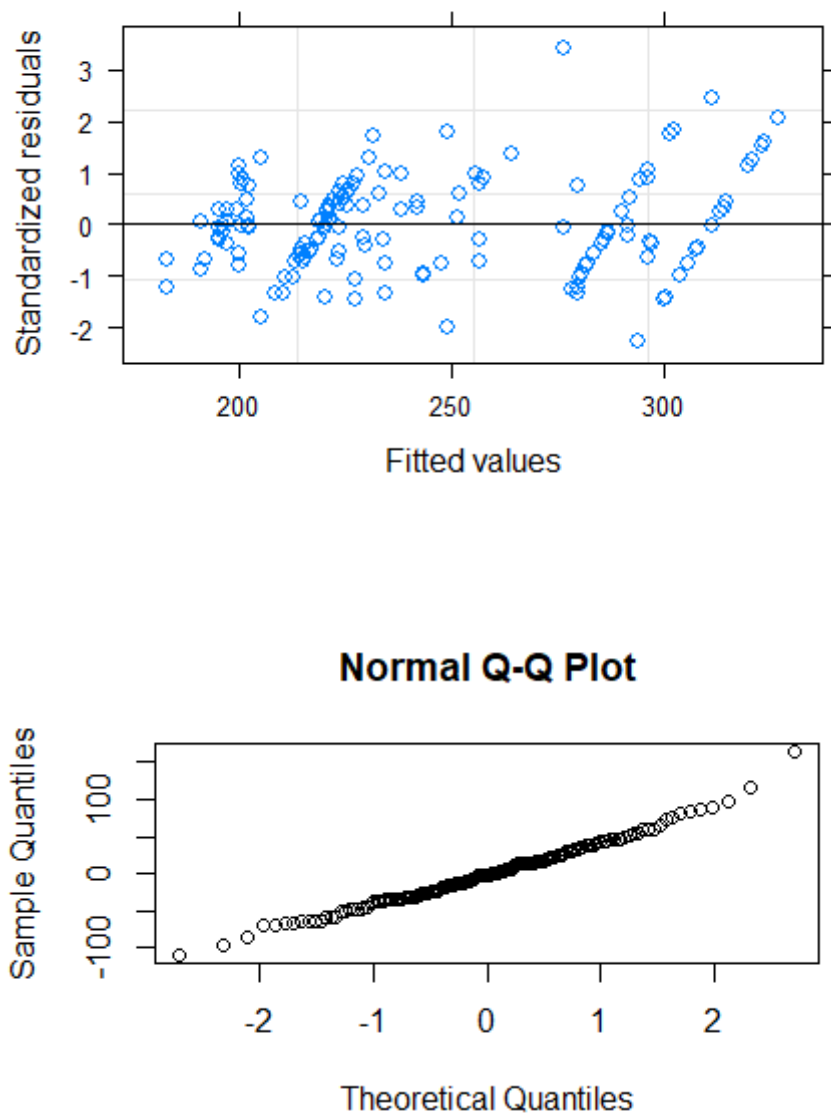

**Fig. S2.** Regression diagnostics for GLMM for body mass of *Acheta domesticus*. Residual and quantile plots

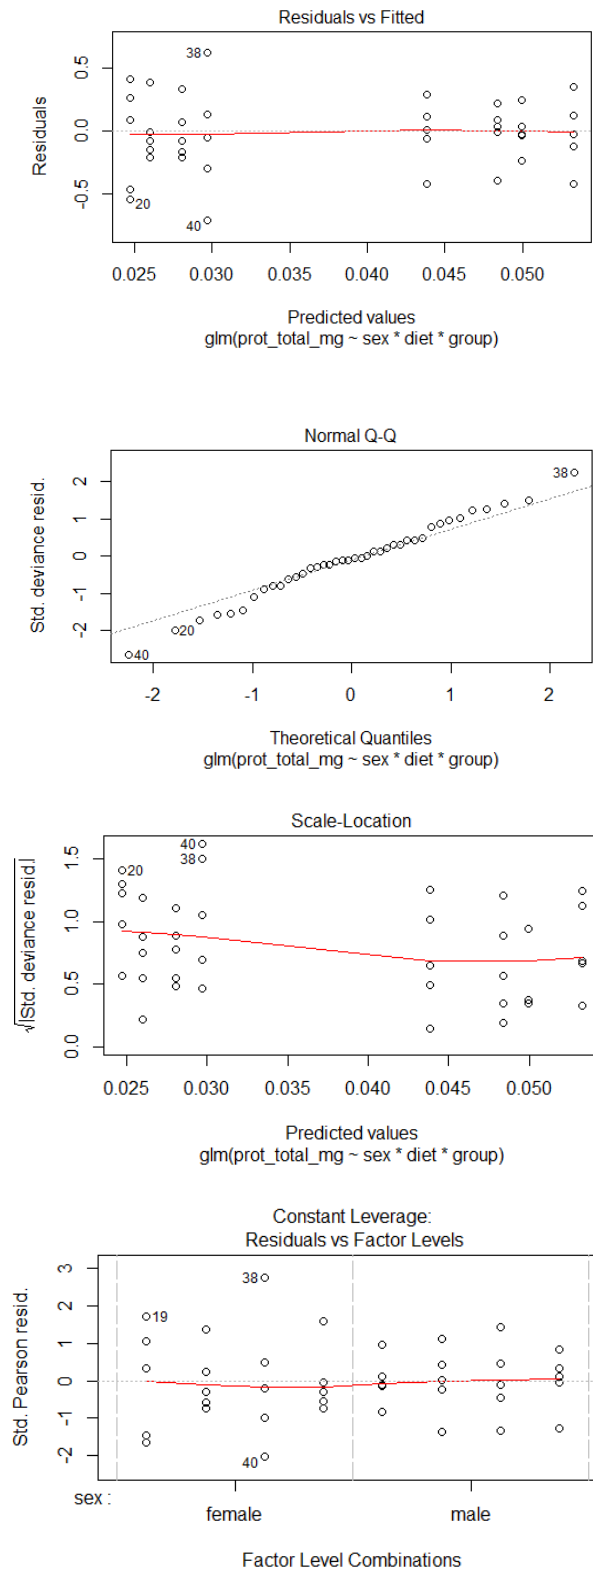

**Fig. S3.** Regression diagnostics for GLM for protein content of *Acheta domesticus*. Residual, quantile, scale-location and Cook's distance plots.

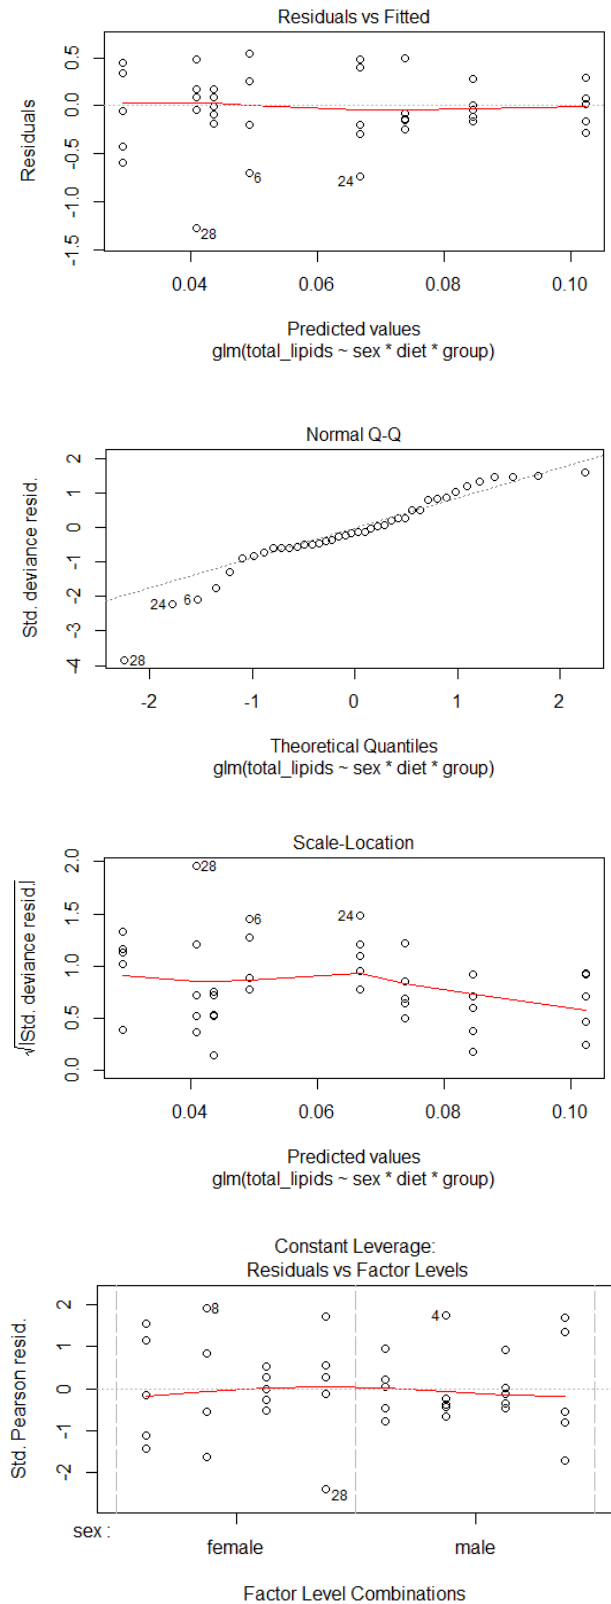

**Fig. S4.** Regression diagnostics for GLM for lipid content of *Acheta domestica*. Residual, quantile, scale-location and Cook's distance plots.



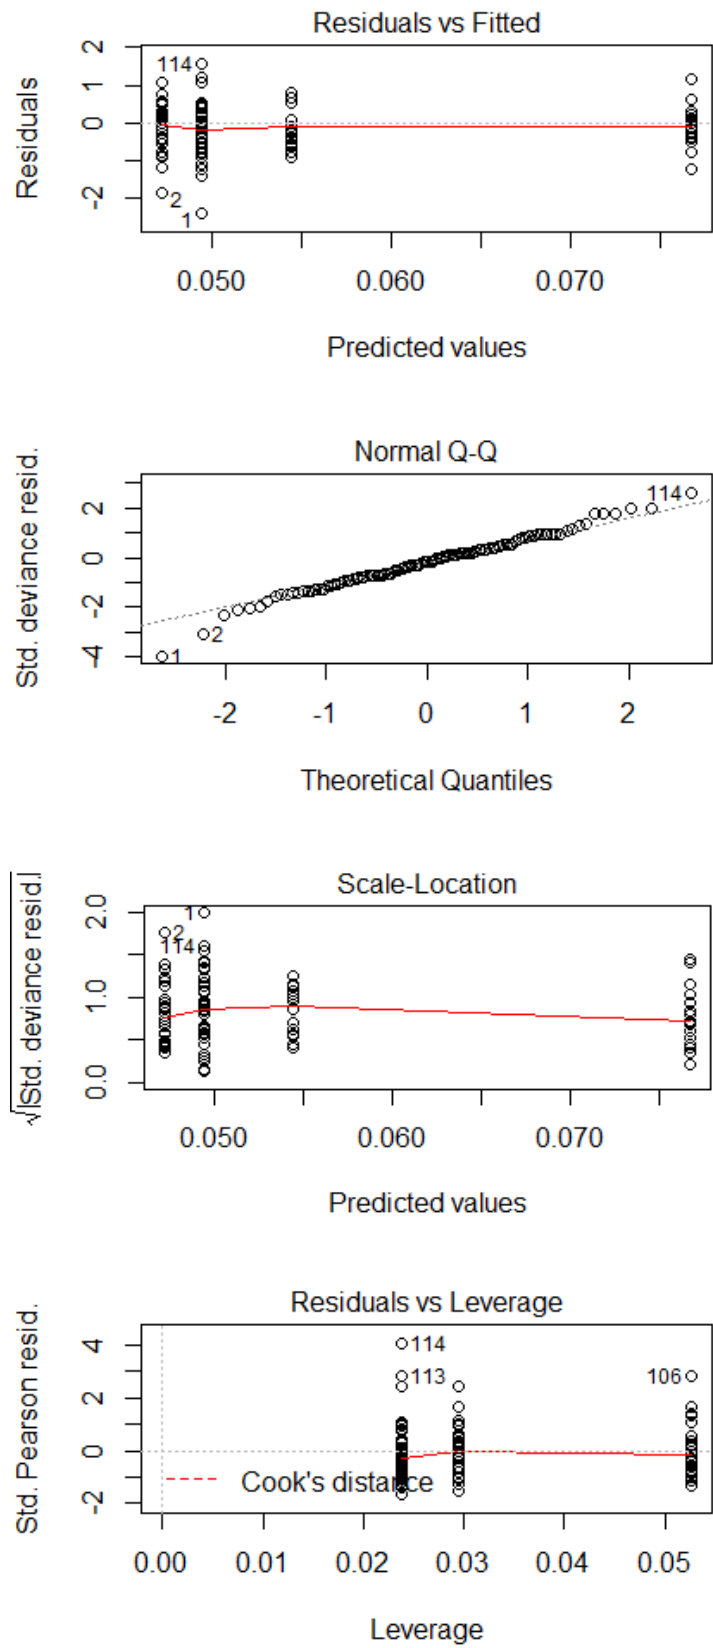

**Fig. S5.** Regression diagnostics for GLM for food consumption of solitary and grouped *Acheta domesticus*. Residual, quantile, scale-location and Cook's distance plots.

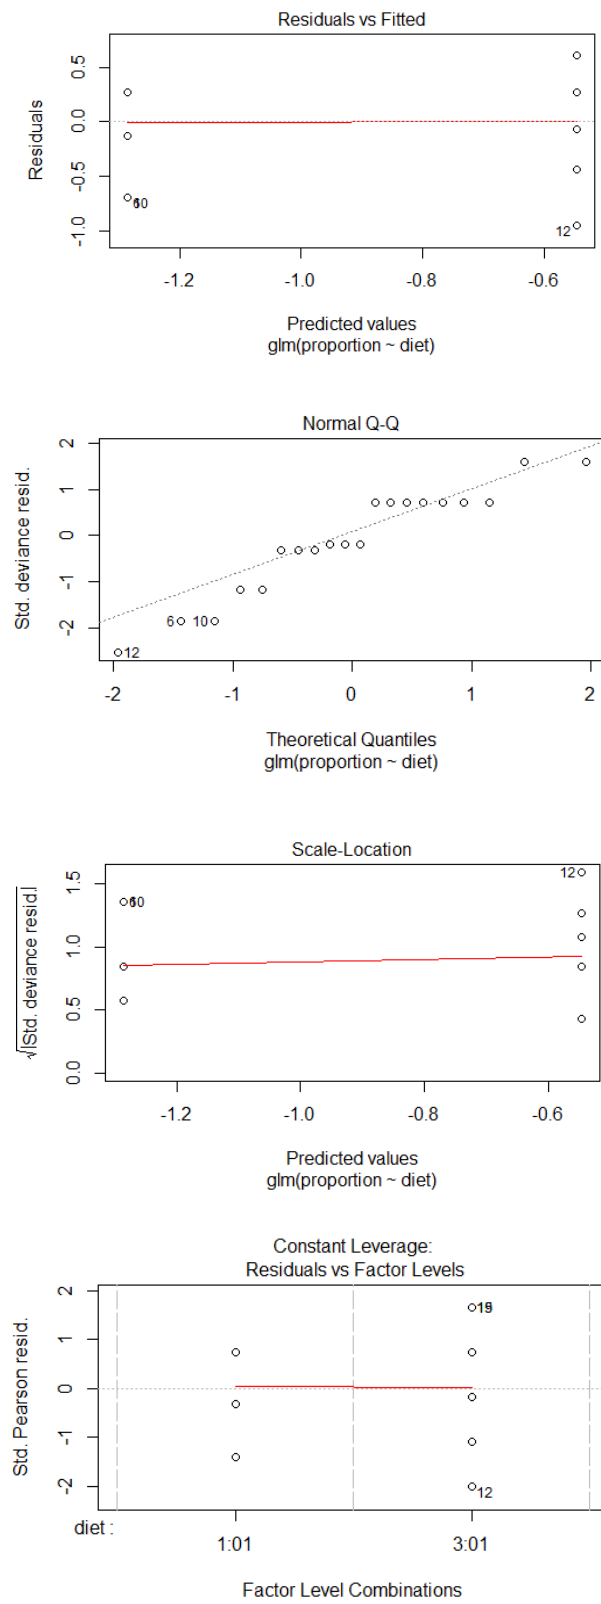

**Fig. S6.** Regression diagnostics for GLM for cannibalism of *Acheta domesticus*. Residual, quantile, scale-location and Cook's distance plots.

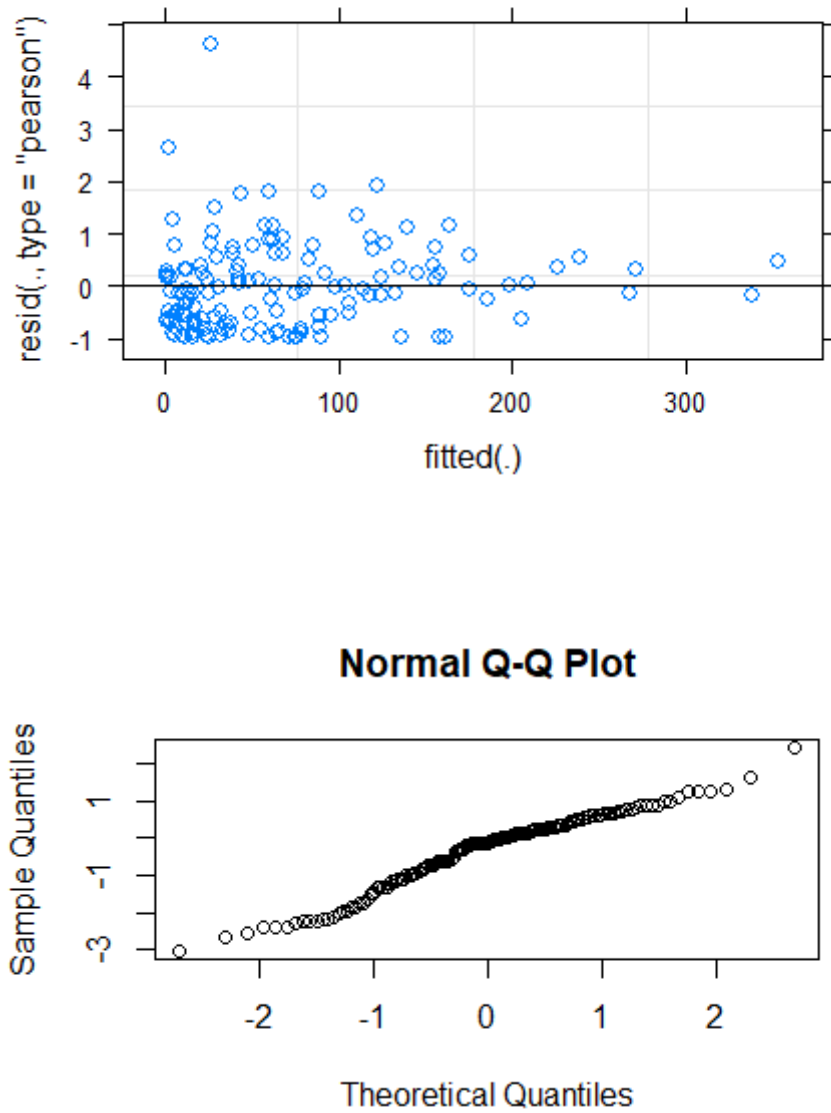

**Fig. S7.** Regression diagnostics for GLMM for weekly egg production of female *Acheta domesticus*. Residual and quantile plots

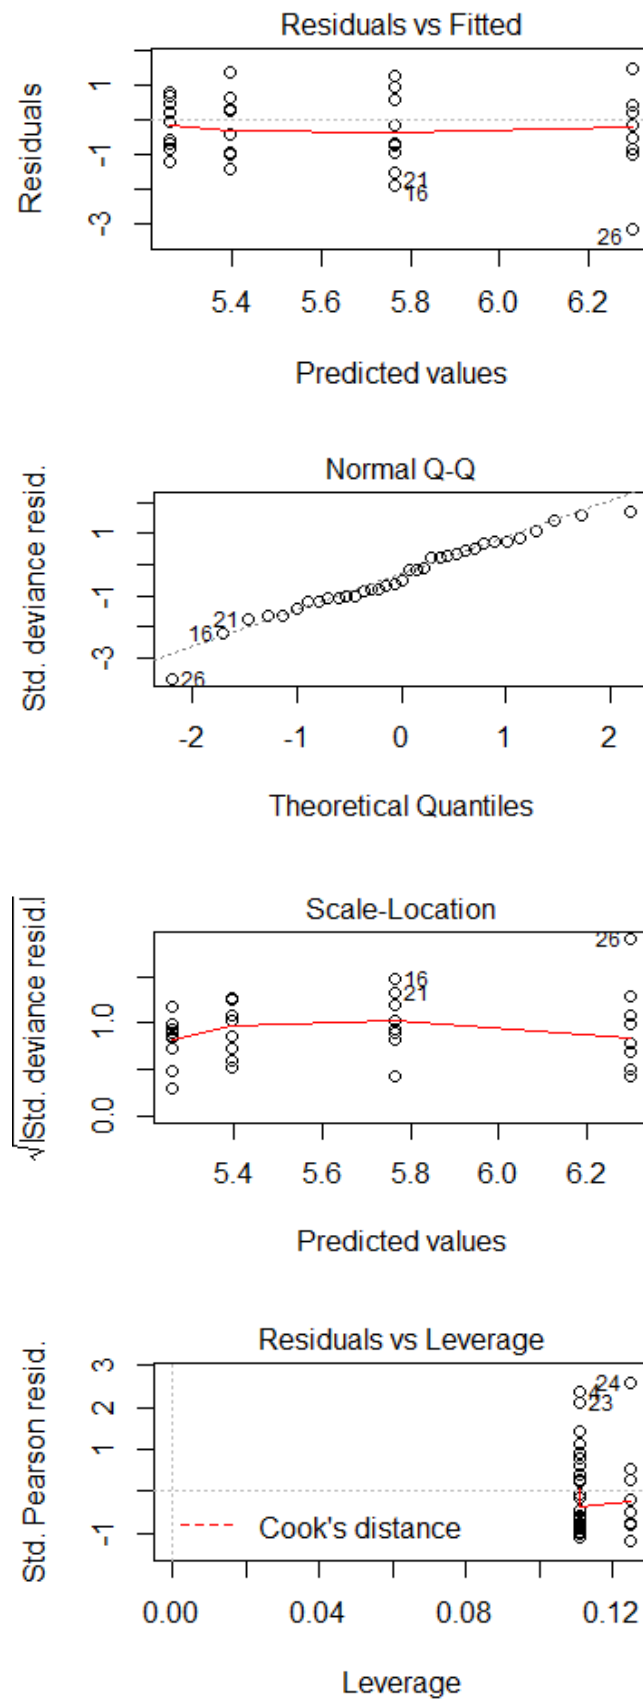

**Fig. S8.** Regression diagnostics for GLM for total egg production of female *Acheta domesticus*. Residual, quantile, scale-location and Cook's distance plots.
